# Supplementary material
Source: HighWire-hosted journal article supplement (https://thorax.bmj.com/highwire/filestream/206383/field_highwire_adjunct_files/3/thorax-2022-219653supp004_data_supplement.pdf)

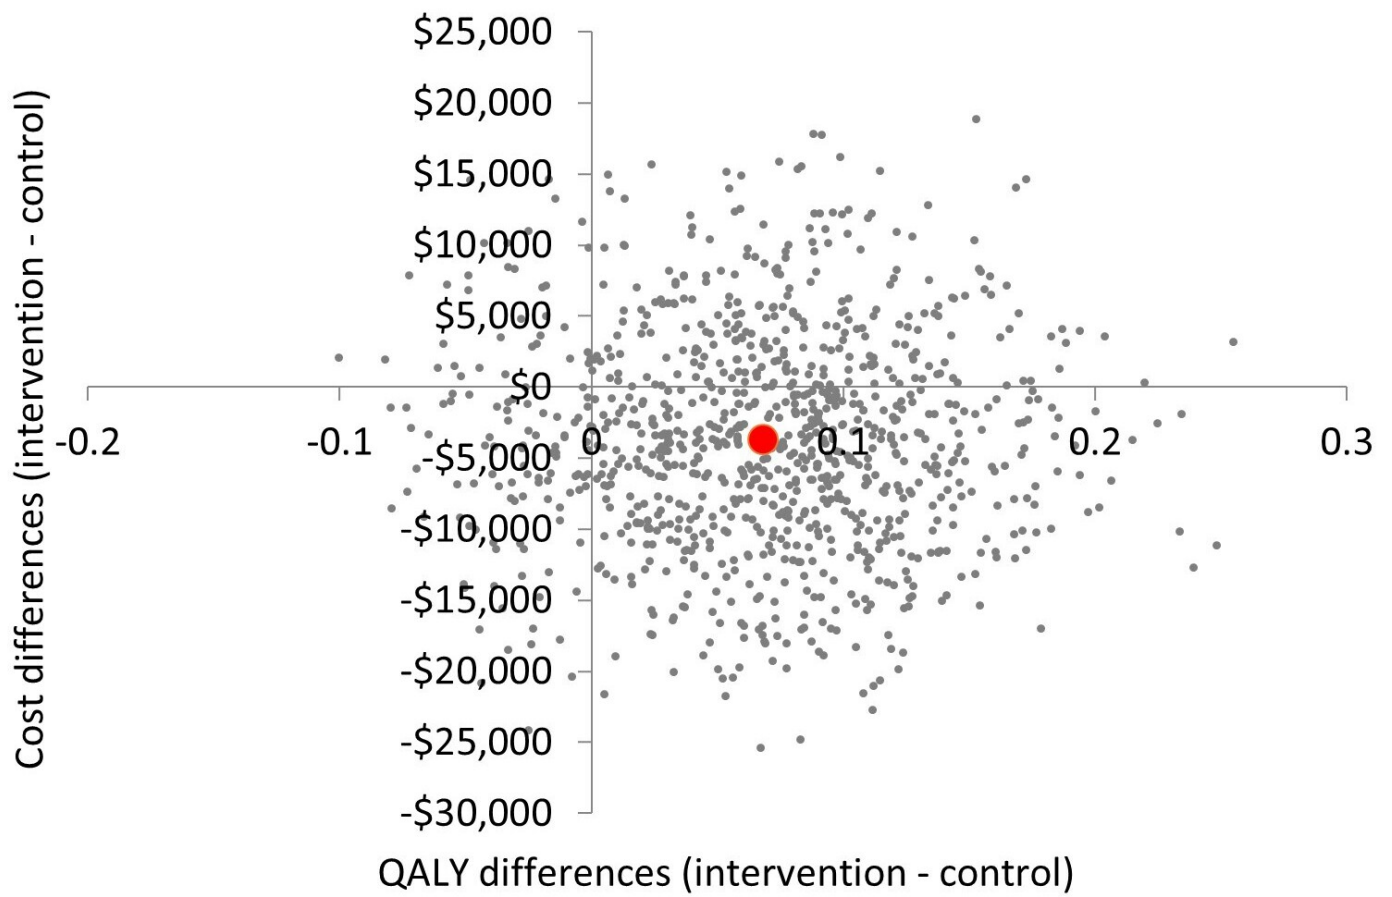

Supplement: thorax-2022-219653supp004_data_supplement.pdf [file thorax-2022-219653supp004_data_supplement.pdf]
